# Supplementary material
Source: publisher figshare collection journal article supplement (https://acs.figshare.com/ndownloader/files/14611418)
Supplement: Supplementary file 1 [file 14611418]

# Synthesis and Isolation of Stable Perylenediimide Radical Anion and its Exceptionally Electron-Deficient Precursor

Yogendra Kumar, Sharvan Kumar, Deepak Bansal and Pritam Mukhopadhyay\*

*School of Physical Science, Jawaharlal Nehru University, New Delhi 110067*

## Table of Contents

|                                                                                                                                     |     |
|-------------------------------------------------------------------------------------------------------------------------------------|-----|
| 1. Experimental details.....                                                                                                        | S2  |
| 2. Synthesis and characterization.....                                                                                              | S4  |
| 3. UV-Vis-NIR absorption spectra of [1], [1] <sup>•-</sup> , [1] <sup>2-</sup> and [2], [2] <sup>•-</sup> , [2] <sup>2-</sup> ..... | S7  |
| 4. Electrochemical reduction of compound [1] and [2] .....                                                                          | S7  |
| 5. Spectroscopic Stability Data of [1 <sup>•-</sup> ].PPh <sub>4</sub> <sup>+</sup> .....                                           | S7  |
| 6. ORTEP representation of crystal structure of [2].....                                                                            | S8  |
| 7. Hydrogen bonding interactions of [1] <sup>•-</sup> .....                                                                         | S8  |
| 8. Hydrogen bonding interactions of PDI to PDI in [1 <sup>•-</sup> ].PPh <sub>4</sub> <sup>+</sup> .....                            | S8  |
| 9. Table S1: X-ray crystallographic table of [2] and [(1 <sup>•-</sup> ).PPh <sub>4</sub> <sup>+</sup> ].....                       | S9  |
| 10. IR-Spectra of [1], [2] and their radical anions.....                                                                            | S10 |
| 11. IR-Spectra of [1] <sup>2-</sup> and [2] <sup>2-</sup> .....                                                                     | S11 |
| 12. EPR Spectra of [1 <sup>•-</sup> ].PPh <sub>4</sub> <sup>+</sup> .....                                                           | S11 |
| 13. EPR Spectra of [2 <sup>•-</sup> ].PPh <sub>4</sub> <sup>+</sup> .....                                                           | S11 |
| 14. Frontier molecular orbital diagram of [PDI-Br <sub>4</sub> CN <sub>4</sub> ].....                                               | S12 |
| 15. Electrostatic surface potential diagrams .....                                                                                  | S12 |
| 16. Spin density and SOMO diagram.....                                                                                              | S12 |
| 17. Table S2: Spin density and Mulliken charges.....                                                                                | S14 |
| 18. AIM Calculation: 3D molecular diagram of PDI .....                                                                              | S15 |
| 19. AIM Calculation: 2D molecular plot of PDI .....                                                                                 | S15 |
| 20. Table S3: Aim calculation parameters.....                                                                                       | S15 |
| 21. NMR spectroscopy of [1], [1] <sup>2-</sup> and [2], [2] <sup>2-</sup> .....                                                     | S16 |
| 22. Mass spectrometry of [1], [1] <sup>•-</sup> , [1] <sup>2-</sup> and [2], [2] <sup>•-</sup> , [2] <sup>2-</sup> .....            | S19 |
| 23. References.....                                                                                                                 | S22 |

## Experimental Details

**General:** All the chemicals employed in the present work were purchased either from Sigma-Aldrich, Spectrochem India, Loba-Chemie, or Thomas-Baker-India and used as received. PPh<sub>4</sub>I was prepared by already reported method.<sup>1</sup> PDI-Br<sub>8</sub> was prepared by our reported method.<sup>2</sup> Thin layer chromatography (TLC) was carried out on aluminum plates coated with silica gel mixed with a fluorescent indicator and was sourced from Merck, Germany. **NMR** (<sup>1</sup>H, <sup>13</sup>C) spectra were recorded on a Bruker 500 MHz spectrometer in CD<sub>3</sub>CN and CDCl<sub>3</sub> with TMS as a standard. Spin multiplicities are reported as a singlet (s), doublet (d), and triplet (t) with coupling constants (*J*) given in Hz, or multiplet (m). ESI-HRMS spectral data were obtained using a Waters make ESIMS model synaptic G2 high definition mass spectrometry.

## Instrumentation and Methods

**UV-Vis-NIR and FT-IR Spectroscopy:** UV-Vis-NIR spectra were recorded on a JASCO V-670 UV-Vis-NIR Spectrophotometer. All the spectroscopic experiments were carried out in dry UV Grade MeCN, which was sourced from Spectrochem, India. Fourier transform-Infrared spectra in neat were recorded using a Thermo Scientific™ Nicolet™ iS™ 50 FT-IR spectrometer.

**Cyclic and Differential Pulse Voltammetry (CV/DPV):** CV and DPV studies were carried out using a computer controlled potentiostat (CHI 650C) and a standard three-electrode arrangement that consisted of both platinum working and auxiliary electrodes and saturated calomel (SCE) as a reference electrode. All electrochemical measurements were carried out in Ar-purged DCM with n-Bu<sub>4</sub>NPF<sub>6</sub> as the supporting electrolyte. CV measurements were performed with scan rate of 200-300 mV/s. DPV was carried out keeping peak amplitude 50 mV, peak width 0.01 sec, pulse period 0.05 sec and increment E at 20 mV. The working electrode was a platinum gauze working electrode inserted into the quartz cell and the other conditions are the same as those for the cyclic voltammetry. Spectroelectrochemical spectra were recorded on a K-MAC Spectra Academy spectrometer using a thin layer quartz cell (0.5 mm) surmounted with a reference electrode (SCE) and a platinum wire as counter electrode. The working electrode was a platinum gauze working electrode inserted within the quartz cell.

**EPR:** Electron Spin Resonance (ESR) spectra were recorded using Bruker EMX 1444 EPR spectrometer operating at 9.455 GHz. Diphenylpicrylhydrazyl, DPPH ( $g = 2.0037$ ), was used for the calibration of ESR spectrometer. The samples were prepared in dry DCM at  $5 \times 10^{-4}$  M under inert atmosphere.

**Theoretical Calculations:** The ground-state geometry optimization was carried out applying the density functional theory (DFT) with the Becke three-parameter<sup>3</sup> hybrid exchange functional in concurrence with the Lee-Yang-Parr gradient-corrected correlation function (B3LYP functional)<sup>4</sup> with the 6-311+G basis set as implemented in Gaussian 09W.<sup>5</sup> All the geometries were optimized without any constrain. To reduce the calculation time axial group (**R'**) of all molecules has been replaced by a methyl group. The electrostatic potentials (ESP) mapped on the electronic density surfaces are based on the DFT calculations and plotted in the Gauss View 5.0 program. To estimate the contributions of the orbitals to the  $n \rightarrow \pi^*$  interaction ( $E_{n \rightarrow \pi^*}$ ) for Br<sub>4</sub>CN<sub>4</sub>-PDIs, DFT calculations were carried out at the B3LYP/6-311+G level with AIM analysis. The spin density and SOMO were calculated by optimizing the CIF coordinates using DFT CAMB3LYP and LANL2DZ basis sets in gas phase.

**X-ray Crystallography:** The single crystals of [1]<sup>•-</sup> were grown by slow evaporation of a solution of [1]<sup>•-</sup> in dichloromethane and trifluoro-benzene with a ratio of 2:1 under ambient conditions at  $\sim 15^\circ\text{C}$ . The crystals were adequately stable under ambient conditions. The reported data sets of all the crystals were collected by mounting the crystal with paratone oil on a loop. X-ray reflections were collected on Bruker D8 Quest diffractometer with CMOS detector using Mo-K $\alpha$  radiation, generated from the micro-focus sealed tube. Data collection was performed using  $\phi$  and  $\omega$ -scans of  $0.5^\circ$  steps at 100 K. Cell determination, data collection, and data reduction were performed with the help of Bruker APEX2 (version: 2.1-b24) software. The structure was solved by intrinsic phasing method (SHELXS-97) and refined by full-matrix least squares refinement method based on  $F^2$ , using, SHELXL-2014.<sup>6</sup> The hydrogen atoms were generated with idealized geometries and refined isotropically using a riding model. The crystal structure data are deposited to Cambridge Structural Database with CCDC Number 1883886.

The single crystals of [2] were grown by slow evaporation of a solution of [2] in MeCN under ambient conditions at RT. The crystals were adequately stable under ambient conditions, losing

the crystalline nature after long exposure to air. The reported data sets of all the crystals were collected by mounting the crystal with paratone oil on a loop. X-ray reflections were collected on Bruker D8 Quest diffractometer with CMOS detector using Mo-K $\alpha$  radiation, generated from the micro-focus sealed tube. Data collection was performed using  $\phi$  and  $\omega$ -scans of 0.5° steps at RT. Cell determination, data collection, and data reduction were performed with the help of Bruker APEX2 (version: 2.1-b24) software. The structure was solved by intrinsic phasing method (SHELXS-97) and refined by full-matrix least squares refinement method based on  $F^2$ , using, SHELXL-2014. The hydrogen atoms were generated with idealized geometries and refined isotropically using a riding model. The crystal structure data are deposited to Cambridge Structural Database with CCDC Number 1883885.

### General Procedure for Synthesis of [1, 2]:

To a 250 mL round-bottom flask 3.139 g (35.2 mmol) of CuCN, 2.0g (1.77 mmol and 1.61 mmol) of respective octa-bromo substituted PDI, and 100 mL of anhydrous dimethylformamide were added. The reaction mixture was stirred under N<sub>2</sub> for 3 h at 80 °C. The reaction mixture was cooled to room temperature and poured into 250 mL of distilled water. The precipitate was filtered, washed with water and dissolved in dichloromethane. The solution was dried over MgSO<sub>4</sub> and concentrated under reduced pressure. The crude product was purified by column chromatography (silica, chloroform/methanol (90/10) to give an orange-red colour solid of [1] or [2]. Yield = 0.598 g (37%) for [1] and 0.579 g (35%) for [2].

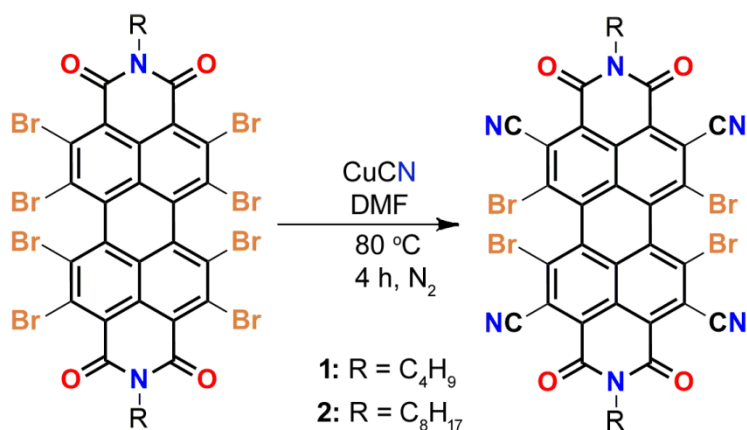

**Scheme S1:** The synthesis of [1] and [2].

$[1]^{\bullet-} \cdot \text{PPh}_4^+ / [2]^{\bullet-} \cdot \text{PPh}_4^+$ : 300 mg (0.33/0.29 mmol) of the solid product obtained from the 1<sup>st</sup> step was dissolved in DCM (~50 mL) followed by addition of  $\text{PPh}_4\text{I}$  (~4 eq.) The resulting solution was allowed to stir at room temperature for 30 minutes to afford a green colored solution. Complete electron transfer and formation of radical anion was ensured by UV-Vis-NIR spectroscopy. The reaction mixture was filtered and dried using rotatory evaporator to obtain the green colored radical anion in powder form. Crystallization of the radical anion was done using DCM and 1,2,3-trifluorobenzene in a ratio of (2:1). Yield = 332.0 mg (80%) for  $[1]^{\bullet-} \cdot \text{PPh}_4^+$  and 310.0 mg (78%) for  $[2]^{\bullet-} \cdot \text{PPh}_4^+$ : [All the operations were performed under ambient conditions].

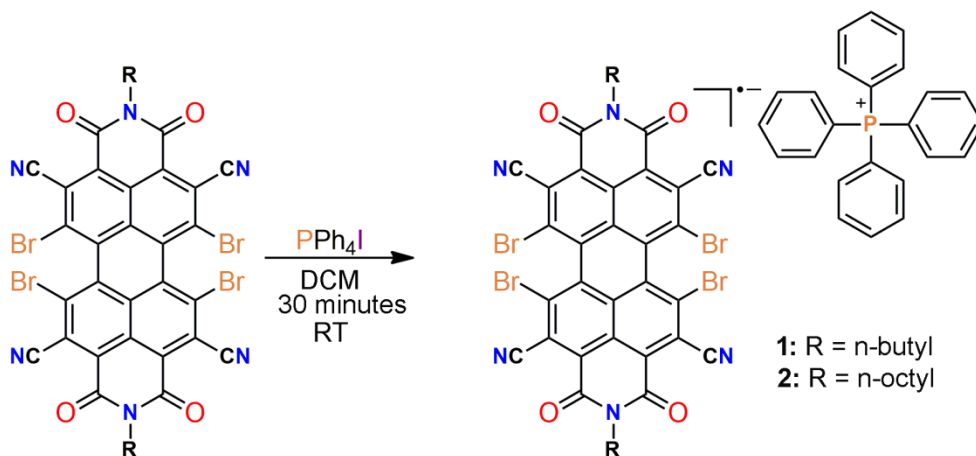

**Scheme S2:** Synthesis of PDI-radical anions.

$[1]^{2-} / [2]^{2-}$ : 200 mg (0.22/0.19 mmol) of the solid product obtained from the 1<sup>st</sup> step was dissolved in  $\text{CH}_3\text{CN}$  (~50 mL) followed by addition MeOH solution of  $\text{Na}_2\text{S}$  (~2 eq.) The resulting solution was allowed to stir at room temperature for 5 minutes to afford a blue colored solution. Complete electron transfer and formation of dianion was ensured by UV-Vis-NIR spectroscopy. The reaction mixture was filtered and dried using rotatory evaporator to obtain the blue colored dianion in powder form. Yield = 191.0 mg (90%) for  $[1]^{2-}$  and 180.0 mg (88%) for  $[2]^{2-}$ . [All the operations were performed under ambient conditions].

**Synthesis of [1]:** N,N-dibutyl-1,6,7,12-tetrabromo-2,4,8,11-tetracyano-perylene-3,4,9,10-tetracarboxylic acid bisimide. Yield = 0.598 g (37%). Melting point > 300 °C. Solubility: soluble in  $\text{CH}_2\text{Cl}_2$  and MeCN.  $^1\text{H}$  NMR (500 MHz,  $\text{CDCl}_3$ , TMS, 298 K):  $\delta$  (ppm) = 4.32 (t, 4H,  $J = 7.5$  Hz), 1.29-1.27 (m, 8H,  $J = 7.5$  Hz), 1.03 (t, 6H,  $J = 7.5$  Hz).  $^{13}\text{C}$  NMR (125 MHz,  $\text{CDCl}_3$ , TMS):

$\delta$  (ppm) = 139.29, 131.89, 130.31, 114.45, 114.07, 42.23, 31.93, 29.51, 25.62, 22.70, 20.33, 14.12. MS (ESI-HRMS): Calculated for  $C_{36}H_{18}N_6O_4$  918.18, found 918.18. FT-IR (neat):  $\bar{\nu}$  ( $cm^{-1}$ ) = 2957, 2928, 2867, 2228, 1710, 1668, 1566, 1354, 1207  $cm^{-1}$ . Anal. Calcd. for  $C_{40}H_{18}N_{10}O_4$ : C 47.09, H 1.98, N 9.15; Found: C 46.97, H 1.95, N 9.21.

**[1]<sup>•-</sup>].PPh<sub>4</sub><sup>+</sup>**: Yield = 332.0 mg (80%). MS (ESI-HRMS): Calculated for  $C_{36}H_{18}N_6O_4$  918.1819, found 918.8109. FT-IR (neat):  $\bar{\nu}$  ( $cm^{-1}$ ) = 2951, 2924, 2862, 2221, 1668, 1640 1545, 1475, 1306, 1102  $cm^{-1}$ .

**[1]<sup>2-</sup>**: Yield = 191.0 mg (90%). <sup>1</sup>H NMR (500 MHz, CD<sub>3</sub>CN, TMS, 298 K):  $\delta$  (ppm) = 4.23 (t, 4H,  $J$  = 7.5 Hz), 1.73-1.67 (m, 4H,  $J$  = 7.5 Hz), 1.48-1.44 (m, 4H,  $J$  = 7.5 Hz), 1.03 (t, 6H,  $J$  = 7.5 Hz). <sup>13</sup>C NMR (125 MHz, CDCl<sub>3</sub>, TMS):  $\delta$  (ppm) = 39.95, 20.28, 13.35. MS (ESI-HRMS): Calculated for  $C_{36}H_{18}N_6O_4$  918.18, found 918.18. FT-IR (neat):  $\bar{\nu}$  ( $cm^{-1}$ ) = 2954, 2924, 2864, 2216, 1616, 1550, 1302  $cm^{-1}$ .

**Synthesis of [2]:** N,N-octyl-1,6,7,12-tetrabromo-2,4,8,11-tetracyano-perylene-3,4,9,10-tetracarboxylic acid bisimide. Yield = 0.579 g (35%). Melting point > 300 °C. Solubility: soluble in CHCl<sub>3</sub> and MeCN. <sup>1</sup>H NMR (500 MHz, CDCl<sub>3</sub>, TMS, 298 K):  $\delta$  (ppm) = 4.30- 4.26 (t, 4H,  $J$  = 7.5 Hz), 1.79 (4H,  $J$  = 7.5 Hz), 1.60 (4H,  $J$  = 7.5 Hz), 1.43-1.39 (16H,  $J$  = 7.5 Hz), 0.91 (t, 6H,  $J$  = 7.5 Hz). <sup>13</sup>C NMR (125 MHz, CDCl<sub>3</sub>, TMS):  $\delta$  (ppm) = 160.49, 159.14, 137.75, 132.60, 131.62, 129.66, 128.41, 126.42, 123.49, 118.59, 114.94, 42.36, 31.79, 29.39, 28.00, 27.48, 22.71, 22.65, 15.75. MS (ESI-HRMS): Calculated for  $C_{44}H_{34}Br_4N_6O_4$  1030.39, found 1029.83. FT-IR (neat):  $\bar{\nu}$  ( $cm^{-1}$ ) = 2954, 2923, 2854, 2223, 1710, 1668, 1560, 1345, 1191  $cm^{-1}$ . Anal. Calcd. for  $C_{44}H_{34}Br_4N_6O_4$ : C 51.29, H 3.33, N 8.16; Found: C 51.45, H 3.45, N 8.24.

**[2]<sup>•-</sup>].PPh<sub>4</sub><sup>+</sup>**: Yield = 310.0 mg (78%). Calculated for  $C_{36}H_{18}N_6O_4$  1030.3945, found 1030.2233. FT-IR (neat):  $\bar{\nu}$  ( $cm^{-1}$ ) = 2950, 2920, 2850, 2219, 1670, 1637 1545, 1480, 1436, 1306, 1107  $cm^{-1}$ .

**[2]<sup>2-</sup>**: Yield = 180.0 mg (88%). <sup>1</sup>H NMR (500 MHz, CD<sub>3</sub>CN, TMS, 298 K):  $\delta$  (ppm) = 4.25-4.13 (t, 4H,  $J$  = 7.5 Hz), 1.83-1.82 (m, 4H,  $J$  = 7.5 Hz), 1.73-1.61 (m, 20H,  $J$  = 7.5 Hz), 1.03 (t, 6H,  $J$  = 7.5 Hz). <sup>13</sup>C NMR (125 MHz, CD<sub>3</sub>CN, TMS): spectrum could not be recorded due to the poor solubility. MS (ESI-HRMS): Calculated for  $C_{36}H_{18}N_6O_4$  1030.3945, found 1030.2233. FT-IR (neat):  $\bar{\nu}$  ( $cm^{-1}$ ) = 2953, 2918, 2851, 2216, 2063, 1617, 1558, 1424, 1310, 1127  $cm^{-1}$ .

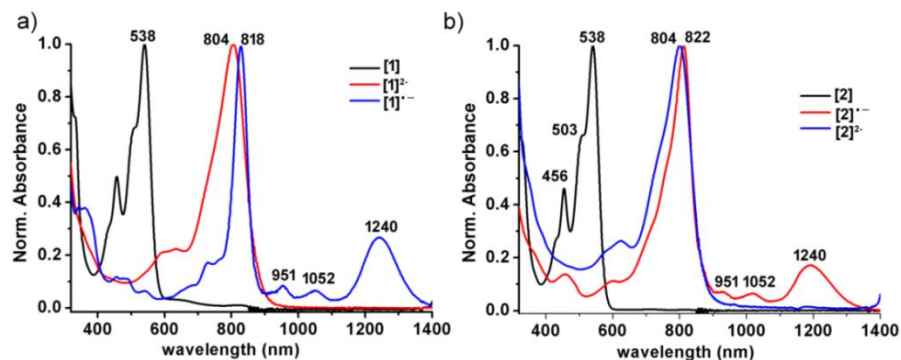

**Figure S1:** Normalized UV-Vis-NIR absorption spectra of a)  $[1]$ ,  $[1]^{\bullet-}$  and  $[1]^{2-}$  and b)  $[2]$ ,  $[2]^{\bullet-}$   $[2]^{2-}$  in DCM.

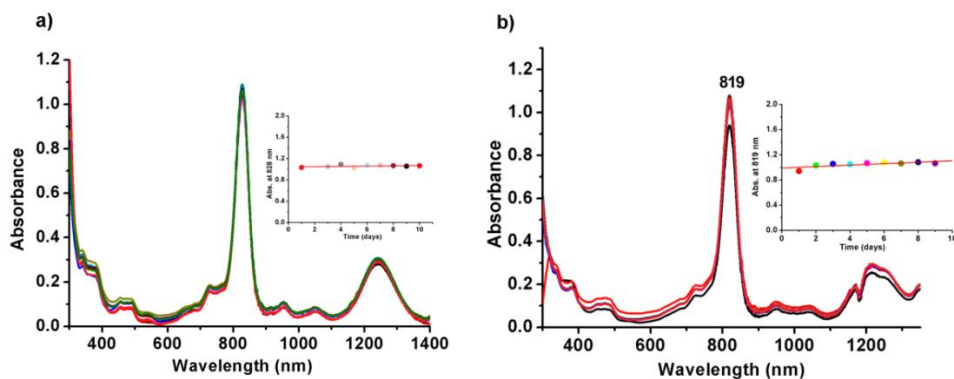

**Figure S2:** Time-dependent UV-vis-NIR spectra of  $[1^{\bullet-}].PPh_4^+$  at  $5 \times 10^{-5}$  M under ambient conditions in a) DCM and b) THF:H<sub>2</sub>O (90:10); and inset figure shows the stability of  $[1^{\bullet-}].PPh_4^+$ .

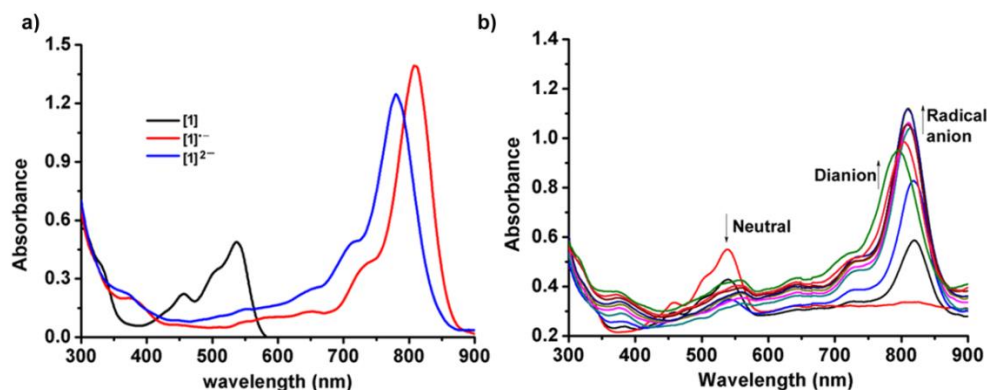

**Figure S3:** (a) UV-vis-NIR absorption changes upon electrochemical reduction spectra of **1** to  $[1^{\bullet-}]$  at -0.16V potential and  $[1^{\bullet-}]$  to  $[1]^{2-}$  at -1V potential. (b) UV-vis-NIR absorption changes upon electrochemical reduction spectra of **2** to  $[2^{\bullet-}]$  at -0.16V potential for 10 minutes and  $[2^{\bullet-}]$  to  $[2]^{2-}$  at -1V potential for 5 minutes.

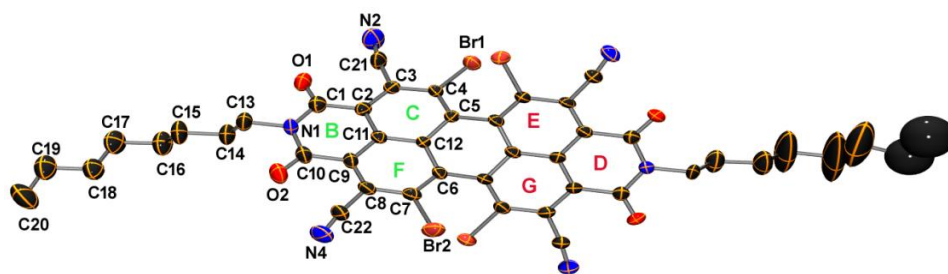

**Figure S4:** ORTEP representation of crystal [2] (ellipsoids are drawn at 50% probability). The H atoms and solvent molecules have been removed for clarity.

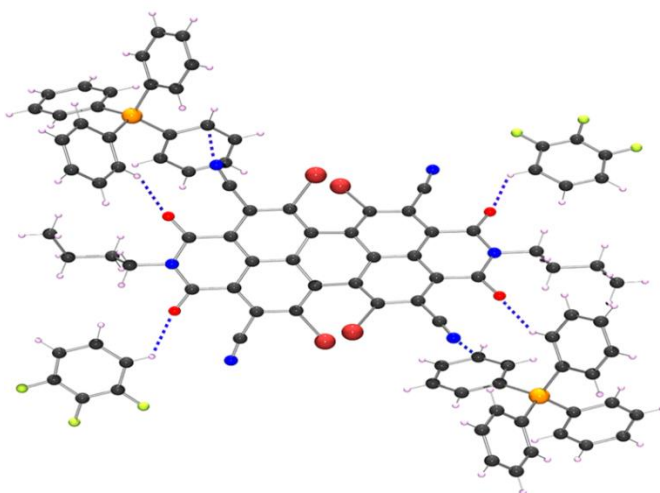

**Figure S5:** Showing the hydrogen bonding interactions of [1]<sup>•-</sup> with PPh<sub>4</sub><sup>+</sup> and solvent molecules.

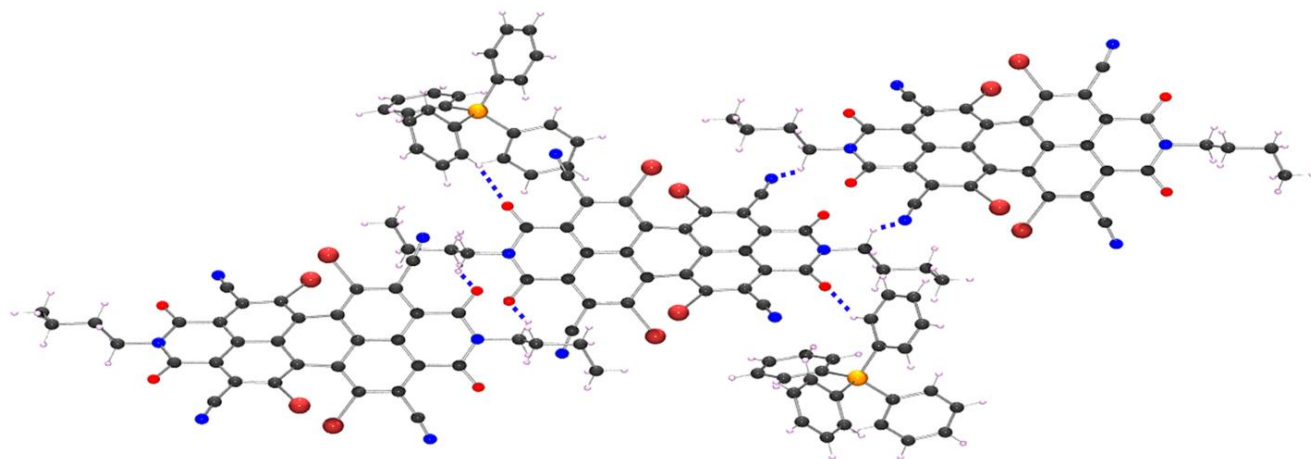

**Figure S6:** Showing intermolecular C≡N---H and C=O---H hydrogen bonding interactions.



**Table S1:** Comparison of the selected bond lengths and angles of the crystal structure and geometry optimized structures of  $[(\mathbf{1}^{\bullet-})\cdot\text{PPh}_4^+]$  and  $[\mathbf{2}]$ .

| Entry | Selected Bond length [ $\text{\AA}$ ] Crystal Data |                           |                | Selected Bond length [ $\text{\AA}$ ]<br>B3LYP 6-311 +G |                           |
|-------|----------------------------------------------------|---------------------------|----------------|---------------------------------------------------------|---------------------------|
|       | Atoms                                              | $[\mathbf{1}^{\bullet-}]$ | $[\mathbf{2}]$ | $[\mathbf{1}]$                                          | $[\mathbf{1}^{\bullet-}]$ |
| 1     | C1—O1                                              | 1.222                     | 1.191          | 1.242                                                   | 1.253                     |
| 2     | C10—O2                                             | 1.220                     | 1.215          | 1.243                                                   | 1.253                     |
| 3     | C1—N1                                              | 1.136                     | 1.379          | 1.400                                                   | 1.405                     |
| 4     | C10—N1                                             | 1.401                     | 1.405          | 1.397                                                   | 1.401                     |
| 5     | C1—C2                                              | 1.465                     | 1.493          | 1.482                                                   | 1.463                     |
| 6     | C2—C3                                              | 1.407                     | 1.370          | 1.397                                                   | 1.417                     |
| 7     | C3—C4                                              | 1.391                     | 1.416          | 1.423                                                   | 1.402                     |
| 8     | C4—C5                                              | 1.398                     | 1.382          | 1.401                                                   | 1.419                     |
| 9     | C5—C12                                             | 1.412                     | 1.425          | 1.435                                                   | 1.432                     |
| 10    | C12—C6                                             | 1.411                     | 1.430          | 1.435                                                   | 1.432                     |
| 11    | C6—C7                                              | 1.412                     | 1.386          | 1.401                                                   | 1.419                     |
| 12    | C7—C8                                              | 1.394                     | 1.414          | 1.423                                                   | 1.402                     |
| 13    | C8—C9                                              | 1.397                     | 1.349          | 1.397                                                   | 1.416                     |
| 14    | C9—C10                                             | 1.464                     | 1.488          | 1.480                                                   | 1.462                     |
| 15    | C2—C11                                             | 1.403                     | 1.410          | 1.418                                                   | 1.418                     |
| 16    | C9—C11                                             | 1.417                     | 1.409          | 1.418                                                   | 1.418                     |
| 17    | C11—C12                                            | 1.422                     | 1.411          | 1.422                                                   | 1.432                     |

|                                 |                       |         |        |         |        |
|---------------------------------|-----------------------|---------|--------|---------|--------|
| 18                              | C17≡N2                | 1.156   | 1.139  | 1.165   | 1.166  |
| 19                              | C18≡N3                | 1.145   | 1.132  | 1.165   | 1.166  |
| 20                              | C4—Br1                | 1.902   | 1.872  | 1.936   | 1.949  |
| 21                              | C7—Br2                | 1.896   | 1.882  | 1.936   | 1.949  |
| Selected bond angles (°)        |                       |         |        |         |        |
| 22                              | C3—C17≡N2             | 172.87° | 172.46 | 175.49  | 175.44 |
| 23                              | C8—C18≡N3             | 172.94° | 173.45 | 175.61  | 175.55 |
| Selected torsions bond angle(°) |                       |         |        |         |        |
| 24                              | C(4)-C(5)-C(6')-C(7') | -       | 41.84  | 34.33   | 29.19  |
| 25                              | C(4')-C(5')-C(6)-C(7) | -       | 39.29  | - 34.32 | -29.19 |

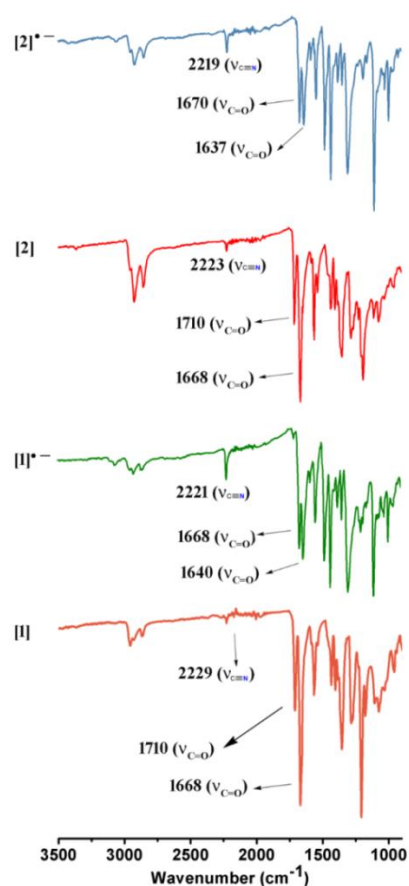

**Figure S7:** FT-IR spectrum of compound [1], [1<sup>+</sup>].PPh<sub>4</sub><sup>+</sup>, [2] and [2<sup>+</sup>].PPh<sub>4</sub><sup>+</sup>.

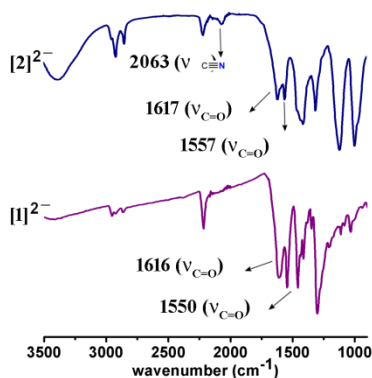

**Figure S8:** FT-IR spectrum of  $[1]^{2-}$  and  $[2]^{2-}$ .

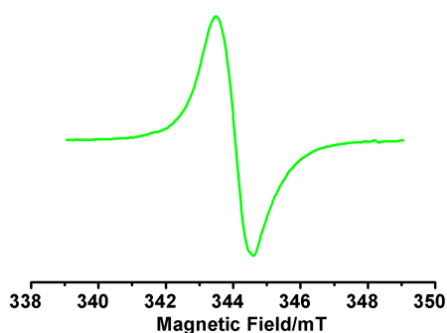

**Figure S9:** Solid state EPR spectrum of  $[1]^{-\bullet}\cdot\text{PPh}_4^+$  at 295 K.: Microwave frequency 9.663 GHz; microwave power 0.805 mW; receiver gain  $2 \times 10^2$ ; modulation frequency 100 kHz; modulation amplitude 1.00 G.  $g$  value = 2.0072.

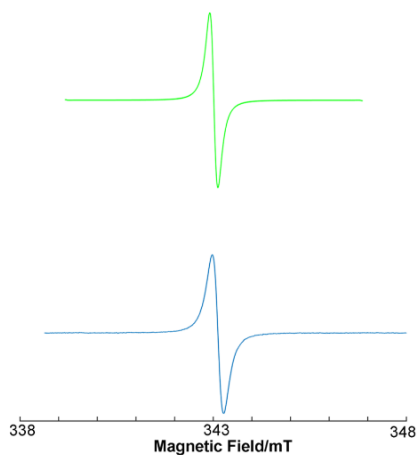

**Figure S10:** EPR (bottom) and simulated (top) spectra for  $[2]^{-\bullet}\cdot$  in DCM at 295 K.: Microwave frequency 9.634 GHz; microwave power 6.471 mW; receiver gain  $1.59 \times 10^2$ ; modulation frequency 100 kHz; modulation amplitude 0.30 G.

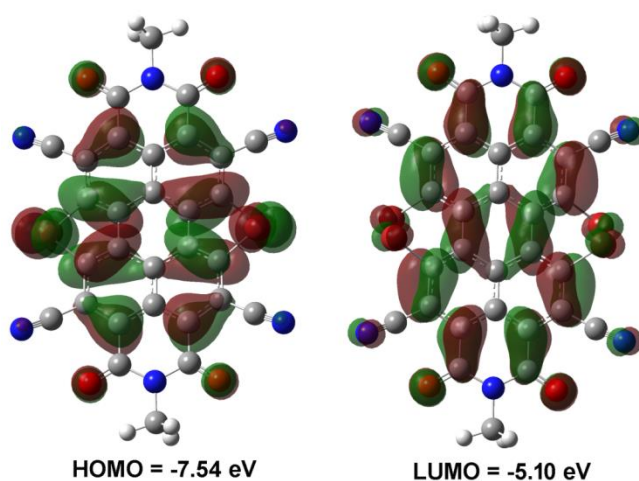

**Figure S11:** Frontier molecular orbital diagram of [PDI-Br<sub>4</sub>CN<sub>4</sub>]. For finding the HOMO-LUMO surface contours, structures were optimized by DFT calculation at B3LYP/6-311+G basis set.

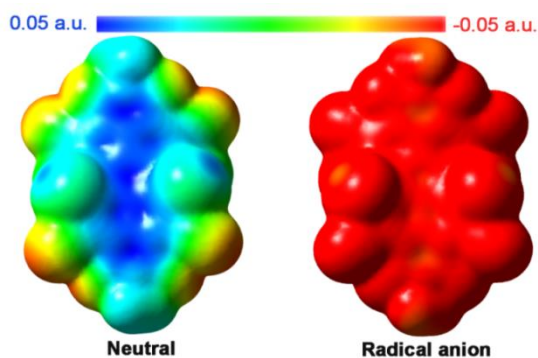

**Figure S12:** ESP maps of the neutral and radical anion of PDI-Br<sub>4</sub>CN<sub>4</sub>. The contours are color-coded from red (electron rich) to blue (electron deficient).

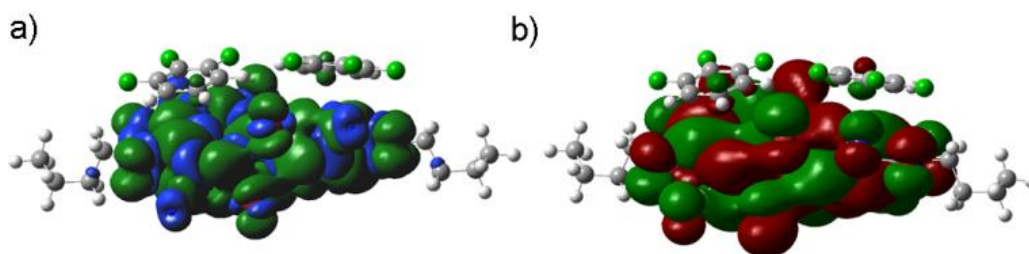

**Figure S13:** a) Spin density (isovalue = 0.0001 e<sup>-</sup>/au<sup>3</sup>) and b) SOMO (isovalue = 0.005 e<sup>-</sup>/au<sup>3</sup>) of the geometry optimized [(1<sup>•-</sup>) 1,2,3-trifluorobenzene] in the gas phase using DFT CAMB3LYP and LANL2DZ.

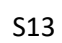

**Table S2:** Calculated Mulliken charges and Spin density distributions of the [(1<sup>•-</sup>).PPh<sub>4</sub><sup>+</sup>] at 6311+G basis set (selected atoms) [Atom numbering is provided with the structure, page S13]:

| Atoms | [(1 <sup>•-</sup> ).PPh <sub>4</sub> <sup>+</sup> ] |                |
|-------|-----------------------------------------------------|----------------|
|       | Mulliken charges                                    | Spin densities |
| Br1   | -0.06003                                            | 0.010288       |
| Br2   | -0.21527                                            | 0.009915       |
| O3    | -0.19124                                            | 0.048070       |
| O4    | -0.16677                                            | 0.047216       |
| N5    | 0.225335                                            | -0.006293      |
| N6    | -0.13877                                            | -0.000359      |
| N7    | -0.17608                                            | -0.002411      |
| C8    | -0.01172                                            | 0.012708       |
| C9    | 0.327207                                            | 0.128782       |
| C10   | -0.37836                                            | 0.092106       |
| C11   | 0.008607                                            | -0.037072      |
| C12   | 0.402923                                            | -0.012268      |
| C13   | 1.068553                                            | -0.015294      |
| C14   | -0.54594                                            | 0.075769       |
| C15   | 0.416592                                            | 0.113236       |
| C16   | 1.098393                                            | -0.028116      |
| C17   | 0.38081                                             | -0.015277      |
| C18   | -1.18969                                            | 0.000463       |
| C19   | -0.36267                                            | -0.008727      |
| C20   | -0.40511                                            | -0.008907      |
| C24   | -0.91249                                            | 0.003558       |
| C42   | 0.024787                                            | -0.019252      |
| C43   | 0.415665                                            | 0.102529       |
| C44   | -0.3467                                             | 0.051201       |
| C45   | 0.009887                                            | -0.026425      |
| C46   | 0.334272                                            | 0.058436       |
| C47   | 0.620268                                            | 0.030055       |
| C48   | -0.79762                                            | 0.024228       |
| C49   | 0.184273                                            | 0.123457       |
| C50   | 1.056783                                            | 0.027146       |
| C51   | 0.385619                                            | 0.079246       |
| C52   | -0.27101                                            | -0.006494      |
| C53   | -0.5115                                             | -0.001027      |
| C54   | -0.44333                                            | 0.005539       |
| C58   | -1.0729                                             | -0.012143      |
| Br35  | -0.00128                                            | 0.008131       |
| Br36  | -0.08023                                            | 0.009813       |
| O37   | -0.16735                                            | 0.059298       |
| O38   | -0.19131                                            | 0.057486       |
| N39   | 0.301571                                            | -0.011664      |
| N40   | -0.03055                                            | 0.018245       |
| N41   | -0.15244                                            | 0.017036       |
| C74   | -0.17499                                            | -0.003258      |

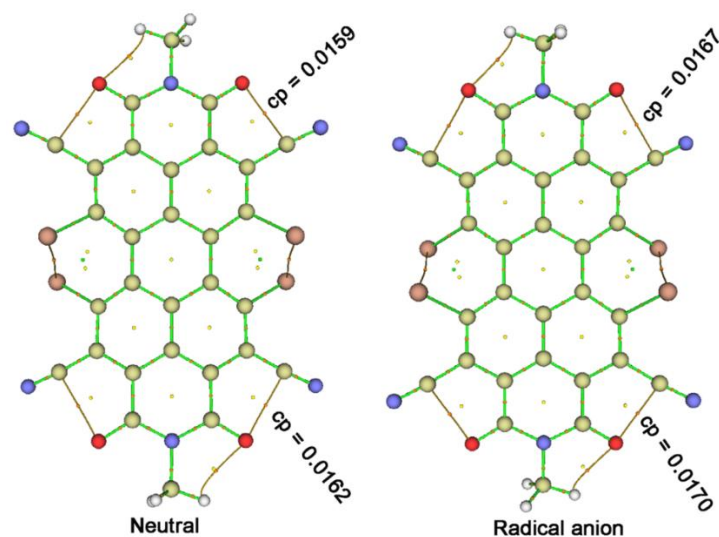

**Figure S14:** 3D molecular diagram representing C---O interaction in neutral PDI-Br<sub>4</sub>CN<sub>4</sub> (left) and PDI-Br<sub>4</sub>CN<sub>4</sub> radical anion (right).

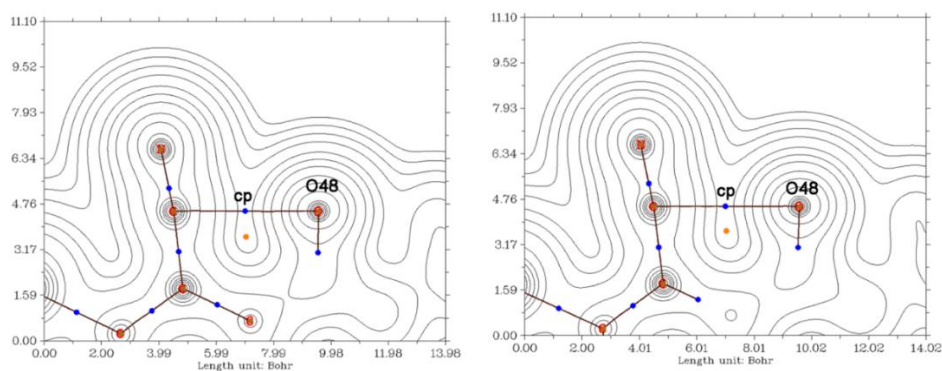

**Figure S15:** 2D contour plot showing the bond path between C and O atom in neutral PDI-Br<sub>4</sub>CN<sub>4</sub> (left) and PDI-Br<sub>4</sub>CN<sub>4</sub> radical anion (right).

**Table S3:** AIM parameters for neutral PDI-Br<sub>4</sub>CN<sub>4</sub> and radical anion of PDI-Br<sub>4</sub>CN<sub>4</sub> molecules.

| Entry                 | Bond    | $\rho(\mathbf{r}_b)^b$ | $\nabla^2\rho(\mathbf{r}_b)^c$ | $E(\mathbf{r}_b)^d$ | $G(\mathbf{r}_b)^e$ | $V(\mathbf{r}_b)^f$ |
|-----------------------|---------|------------------------|--------------------------------|---------------------|---------------------|---------------------|
| <b>1</b>              | C1---O1 | 0.0170                 | 0.0609                         | 0.0013              | 0.0132              | -0.0124             |
| <b>1<sup>•-</sup></b> | C1---O1 | 0.0162                 | 0.0577                         | 0.0013              | 0.0131              | -0.0117             |

<sup>a</sup>Theoretical topological properties at the BCPs; values from a 6-311+G basis set. <sup>b</sup>The electron density at BCP. <sup>c</sup>Laplacian of electron density. <sup>d</sup>The electron energy density. <sup>e</sup>Kinetic energy electron density. <sup>f</sup>Potential energy electron density. All are in a.u.

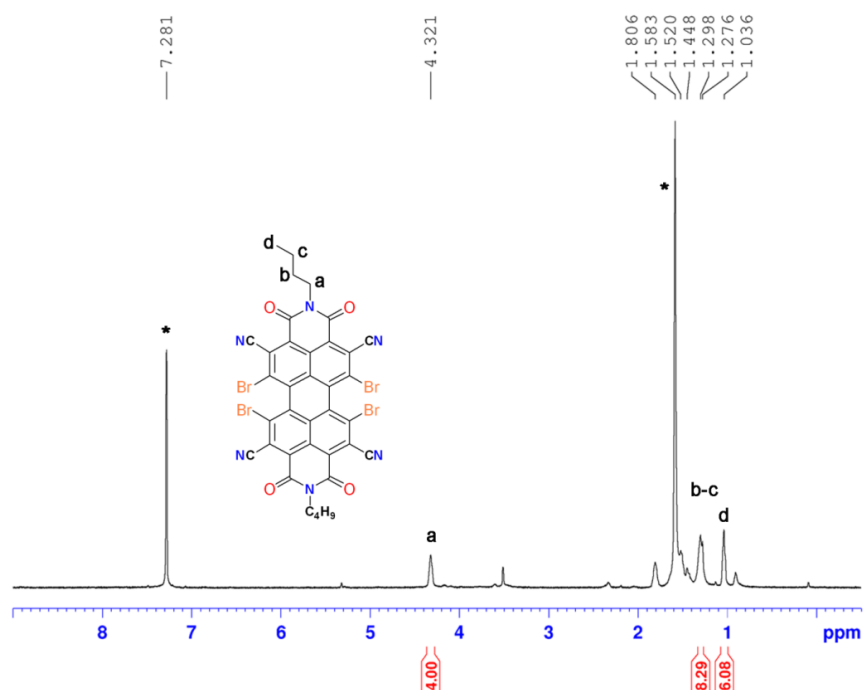

**Figure S16:** 500 MHz  $^1\text{H}$  NMR spectrum of [1] in  $\text{CDCl}_3$  at room temperature. Number of scans (NS = 64). \*residual solvent peak.

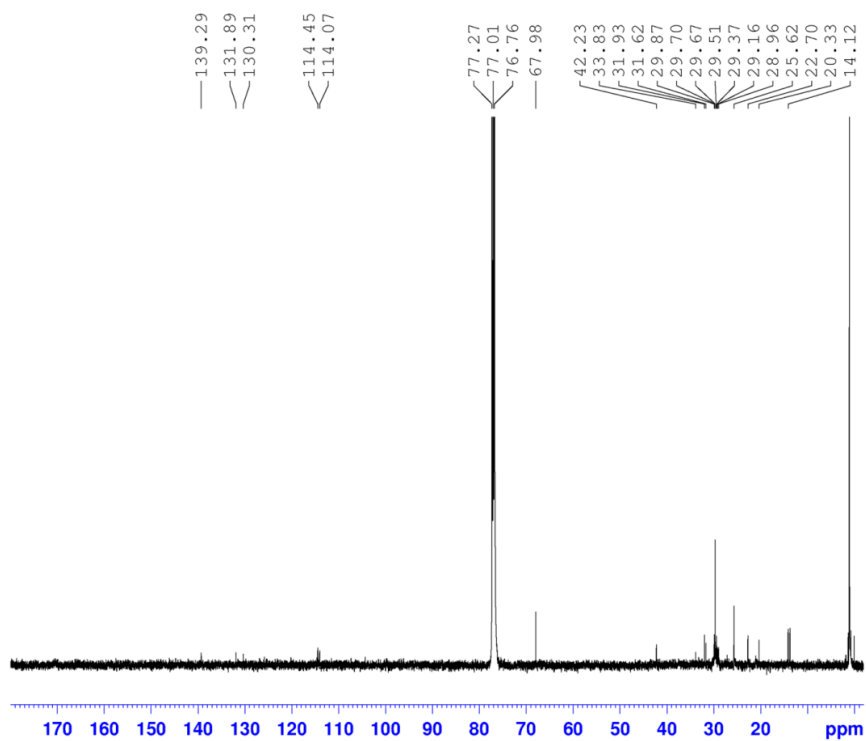

**Figure S17:** 125 MHz  $^{13}\text{C}$  spectrum of [1] in  $\text{CDCl}_3$  at room temperature.



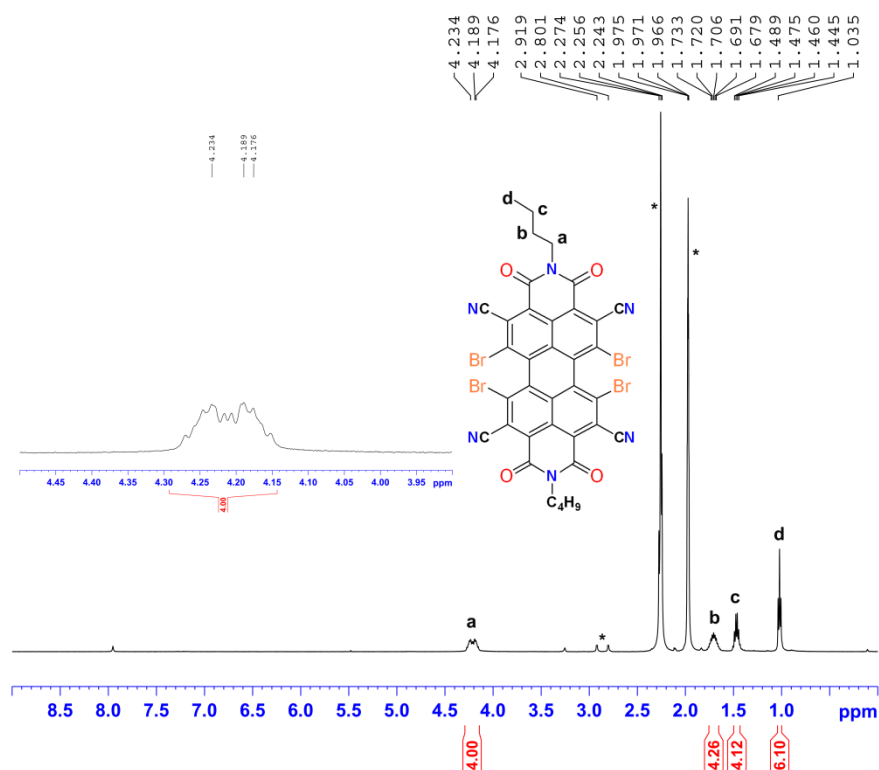

**Figure S18:** 500 MHz <sup>1</sup>H NMR spectrum of [1]<sup>2-</sup> in CD<sub>3</sub>CN at room temperature. Number of scans (NS = 32). \*residual solvent peak.

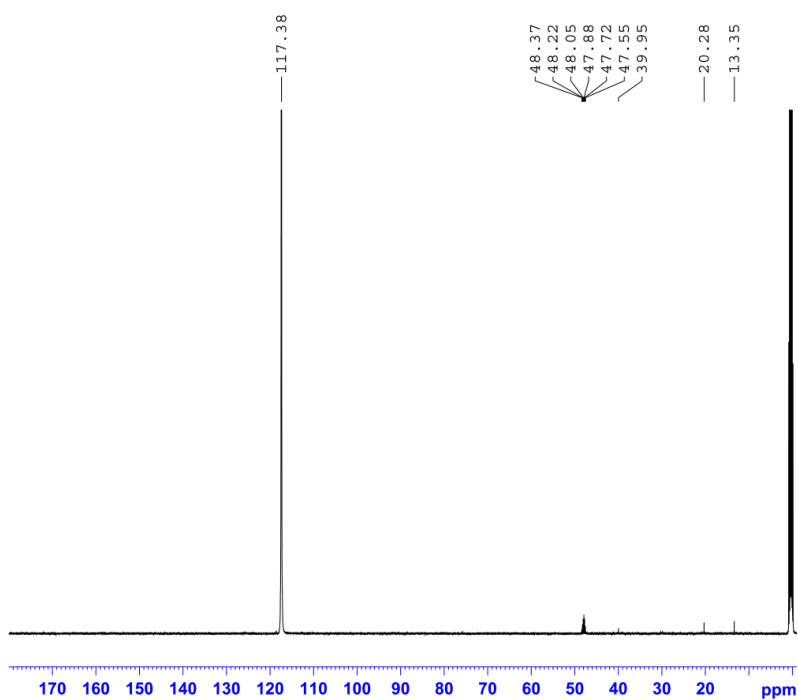

**Figure S19:** 125 MHz <sup>13</sup>C NMR spectrum of [1]<sup>2-</sup> in CD<sub>3</sub>CN at room temperature.

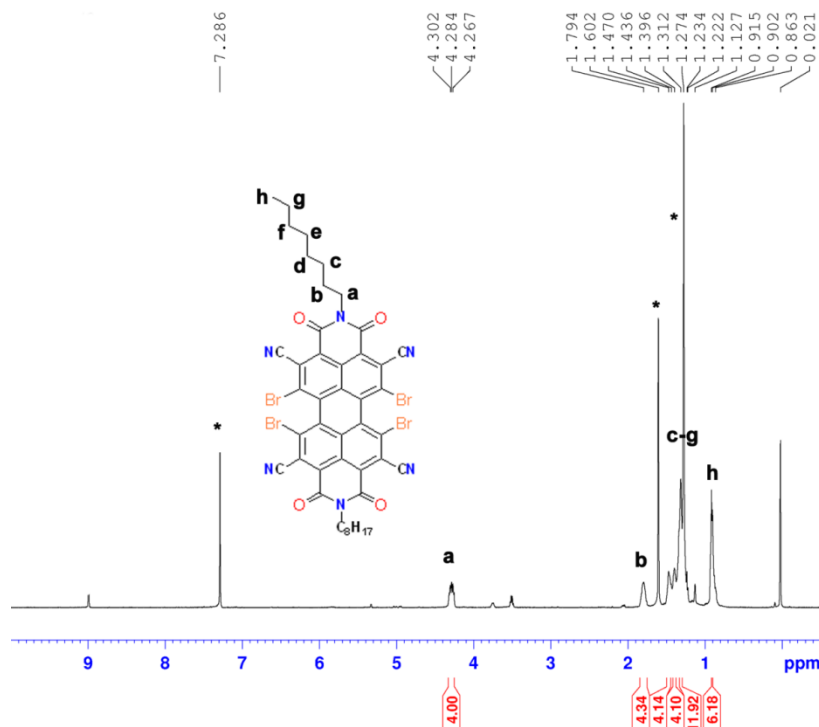

**Figure S20:** 500 MHz  $^1\text{H}$  NMR spectrum of [2] in  $\text{CDCl}_3$  at room temperature. Number of scans (NS = 160). \* residual solvent peak.

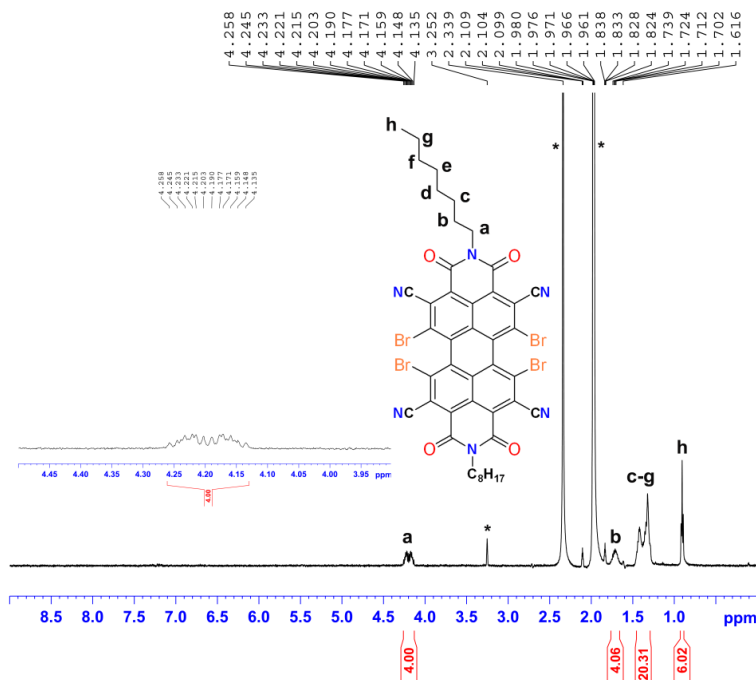

**Figure S21:** 500 MHz  $^1\text{H}$  NMR spectrum of [2]<sup>2-</sup> in  $\text{CD}_3\text{CN}$  at room temperature. Number of scans (NS = 64). \* residual solvent peak.

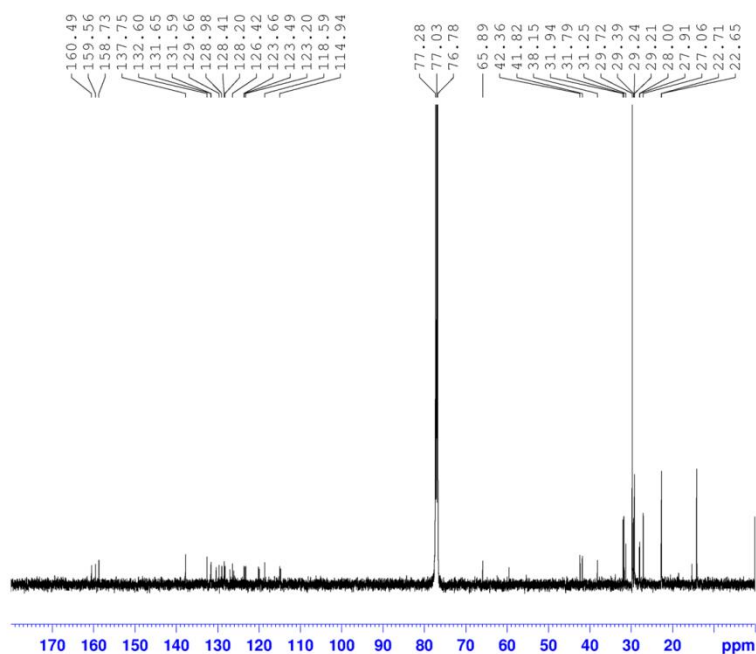

**Figure S22:** 125 MHz  $^{13}\text{C}$  spectrum of [2] in  $\text{CDCl}_3$  at room temperature.

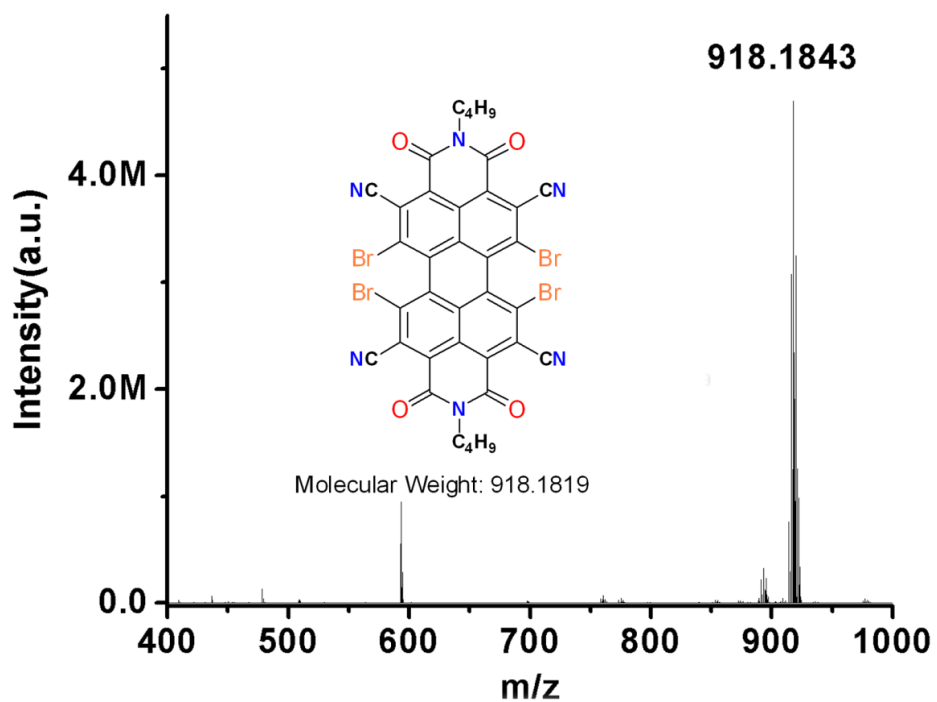

**Figure S23:** HRMS-ESI mass spectrometry of [1].

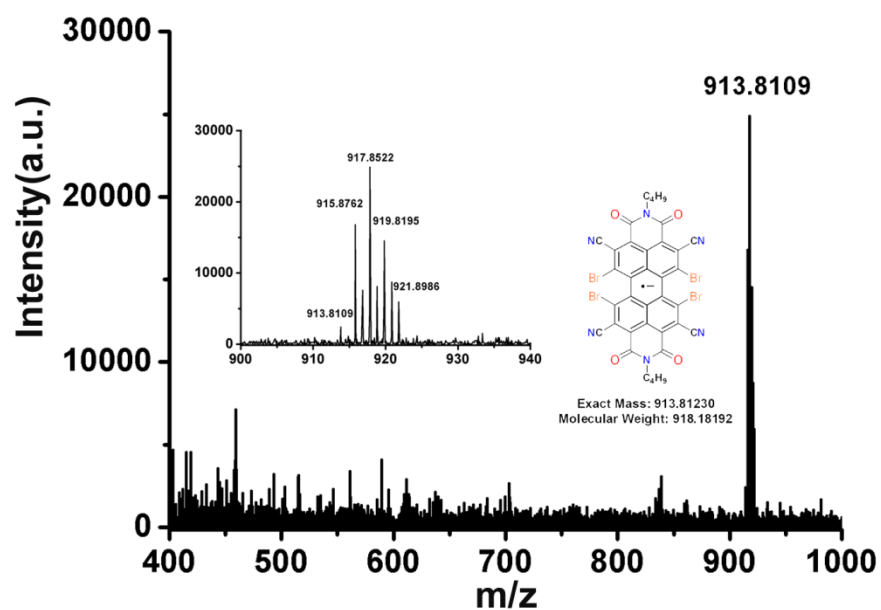

**Figure S24:** HRMS-ESI mass spectrometry of  $[(1\bullet^-).PPh_4^+]$ .

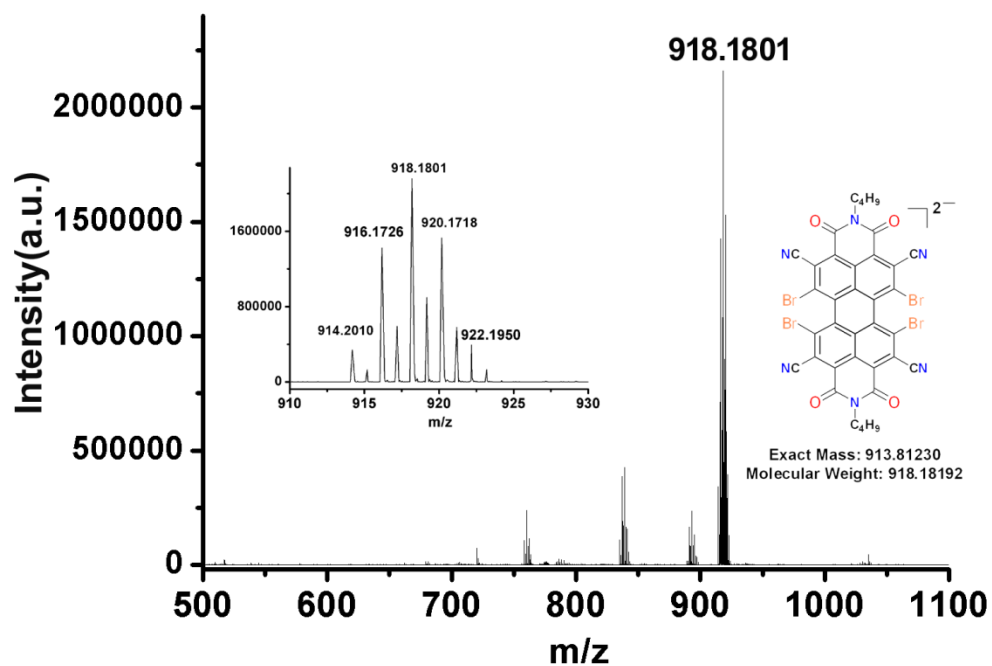

**Figure S25:** HRMS-ESI mass spectrometry of  $[1]^{2-}$ .

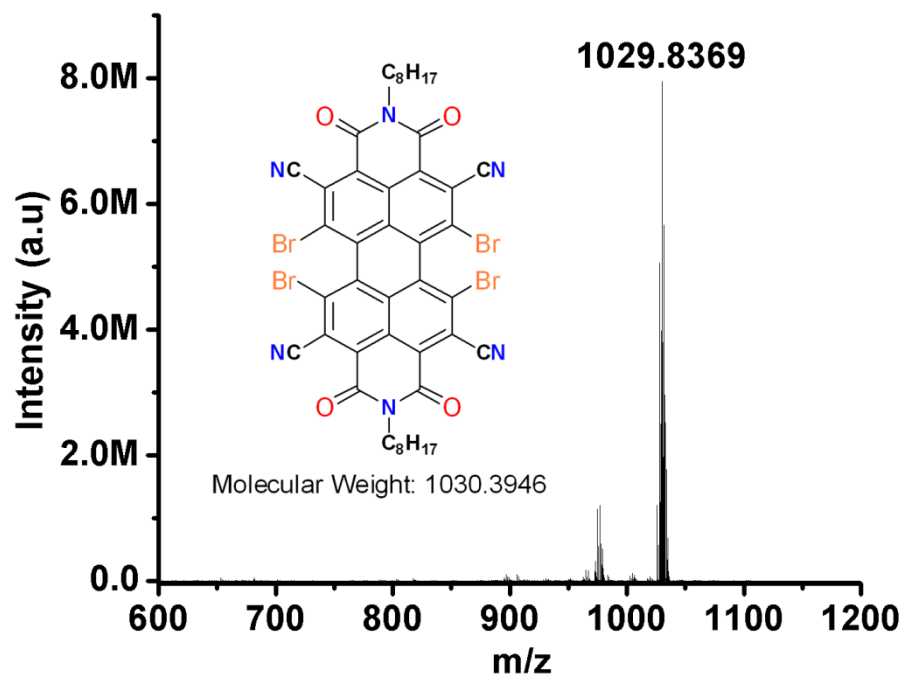

Figure S26: HRMS-ESI mass spectrometry of [2].

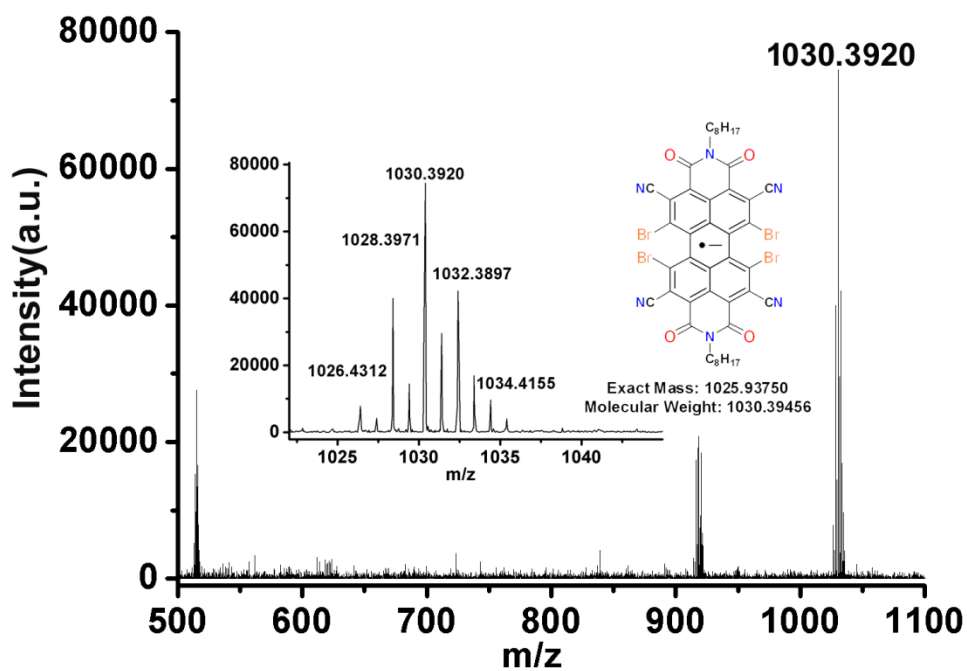

Figure S27: HRMS-ESI mass spectrometry of  $[(2\cdot^-).PPh_4^+]$ .

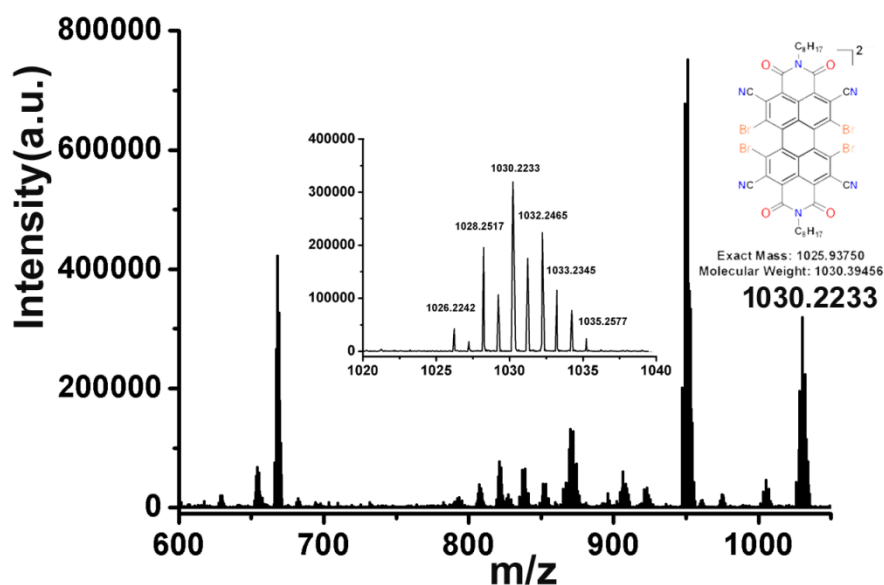

**Figure S28:** HRMS-ESI mass spectrometry of  $[2]^{2-}$ .

#### References:

1. T. Migita, T. Nagai, K. Kiuchi and M. Kosugi, *Bull. Chem. Soc. Jpn.* **1983**, 56, 2869.
2. Y. Kumar, S. Kumar, S. K. Keshri, J. Shukla, S. S. Singh, T. S. Thakur, M. Denti, A. Facchetti and P. Mukhopadhyay, *Org. Lett.* **2016**, 18, 472.
3. A. D. Becke, *J. Chem. Phys.* **1993**, 98, 5648.
4. C. Lee, W. Yang and R. G. Parr, *Phys. Rev. B* **1988**, 37, 785.
5. Gaussian 09, Revision D.01, M. J. Frisch, G. W. Trucks, H. B. Schlegel, G. E. Scuseria, M. A. Rob, J. R. Cheeseman, G. Scalmani, V. Barone, B. Mennucci, G. A. Petersson, H. Nakatsuji, M.; Li, X. Caricato, H. P. Hratchian, A. F. Izmaylov, J. Bloino, G. Zheng, J. L. Sonnenberg, M. Hada, M. Ehara, K. Toyota, R. Fukuda, J. Hasegawa, M. Ishida, T. Nakajima, Y. Honda, O. Kitao, H. Nakai, T. Vreven, Jr. J. A. Montgomery, J. E. Peralta, F. Ogliaro, M. Bearpark, J. J. Heyd, E. Brothers, K. N. Kudin, V. N. Staroverov, R. Kobayashi, J. Normand, K. Raghavachari, A. Rendell, J. C. Burant, S. S. Iyengar, J. Tomasi, M. Cossi, N. Rega, J. M. Millam, M. klene, J. E. Knox, J. B. Cross, V. Bakken, C. Adamo, J. Jaramillo, R. Gomperts, R. E. Startmann, O. Yazyev, A. J. Austin, R. Cammi, C. Pomelli, J. W. Ochterski, R. L. Martin, K. Morokuma, V. G. Zakrzewski, G. A. Voth, P. Salvador, J. J. Dannenberg, S. Dapprich, A. D. Daniels, Ö. Farkas, J. B.

- Foresman, J. V. Ortiz, J. Cioslowski and D. J. Fox, *Gaussian, Inc.*, Wallingford CT, **2009**.
6. G. M. Sheldrick, *Acta Crystallogr. Sect. A* **2008**, 64, 112.
